# Supplementary material for: Feasibility, acceptability, and efficacy of online supportive care for individuals living with and beyond lung cancer: a systematic review
Source: Springer Nature journal article supplement (doi:10.1007/s00520-021-06274-x), 2021-05-18
Supplement: MOESM1 [file 19173398]

## Supplemental Material

**Title:** Feasibility, acceptability, and efficacy of online supportive care for individuals living with and beyond lung cancer: a systematic review.

**Journal Name:** Supportive Care in Cancer

**Authors:**

Jordan Curry<sup>a</sup>, Michael Patterson<sup>a</sup>, Sarah Greenley<sup>b</sup>, Mark Pearson<sup>a</sup>, Cynthia C. Forbes<sup>a</sup>

**Affiliations:**

<sup>a</sup>Wolfson Palliative Care Research Centre, Hull York Medical School, University of Hull, Hull, United Kingdom.

<sup>b</sup>Institute for Clinical and Applied Health Research, Hull York Medical School, University of Hull, Hull, United Kingdom

**Corresponding Author Email:**

[Jordan.Curry@hyms.ac.uk](mailto:Jordan.Curry@hyms.ac.uk).

### Appendix 1: Search strategy for Medline via OVID

1. exp Lung Neoplasms/
2. (Lung adj2 (cancer\* or neoplasm\* or tumor\* or tumour\* or carcinoma\*)).ti,ab,kw.
3. exp Cancer Survivors/
4. or/1-3 [Lung Cancer Concepts]
5. exp internet/ or exp internet access/ or social media/ or exp Cell Phone,/ or Smartphone/
6. Online Care.ab,ti,kw.
7. Online Support.ab,ti,kw.
8. eHealth.ab,ti,kw.
9. mHealth.ab,ti,kw.

10. Mobile Phone\*.ab,ti,kw.
11. Smart Phone\*.ab,ti,kw.
12. Smartphone\*.ab,ti,kw.
13. Internet\*.ab,ti,kw.
14. Mobile App\*.ab,ti,kw.
15. Mobile Application\*.ab,ti,kw.
16. Website\*.ab,ti,kw.
17. eSupport.ab,ti,kw.
18. Digital Support.ab,ti,kw.
19. Web\* Support.ab,ti,kw.
20. Telehealth.ab,ti,kw.
21. patient portal.ab,ti,kw.
22. exp Telemedicine/
23. or/5-22 [Internet Concepts]
24. ((message or discussion) adj3 (board\* or internet or online)).ti,ab,kw.
25. (chatroom\* or (chat adj room)).ti,ab,kw.
26. ((online or discussion) adj3 forum\*).ti,ab,kw.
27. (social media or Facebook or Twitter or Instagram or blog\* or YouTube or WhatsApp).ti,ab,kw.
28. exp Blogging/
29. or/24-28 [Social Media and Online Discussions Concepts]
30. 23 or 29
31. 4 and 30
